# Supplementary material for: Accumulation rates over the past 260 years archived in Elbrus ice core, Caucasus
Source: Copernicus journal article supplement (doi:10.5194/cp-20-237-2024), 2024-01-30
Supplement: Supplementary file 1 [file cp-20-237-2024-supplement.pdf]

Supplement of *Clim. Past*, 20, 237–255, 2024  
<https://doi.org/10.5194/cp-20-237-2024-supplement>  
© Author(s) 2024. CC BY 4.0 License.

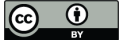

*Supplement of*

## **Accumulation rates over the past 260 years archived in Elbrus ice core, Caucasus**

**Vladimir Mikhalenko et al.**

*Correspondence to:* Stanislav Kutuzov ([kutuzov.1@osu.edu](mailto:kutuzov.1@osu.edu))

The copyright of individual parts of the supplement might differ from the article licence.

**Supplementary**

**Table S1. Ice layers suspected to be had impacted by volcanic events**

| Ice layers | Depth (m) | Depth (mwe) | Volcanic event (A5) | Volcanic event (A3 & A4)                                                                 |
|------------|-----------|-------------|---------------------|------------------------------------------------------------------------------------------|
| (a)        | 140.0     | 106.9       | 1877/78 Cotopaxi ?  | 1872 Sinarka, 1872 Merapi, 1972 Vesuvius, 1873 Grimsvotn, 1875 Askja, 1877 Cotopaxi, ??? |
| (b)        | 146.38    | 112.57      |                     | 1854 Shiveluch                                                                           |
| (c)        | 149.16    | 115.03      | 1854 Shiveluch ?    | 1835 Cosigüina ?                                                                         |
| (d)        | 153.70    | 118.96      | 1835 Cosigüina      | 1815 Tambora                                                                             |
| (f)        | 154.73    | 119.84      |                     |                                                                                          |
| (e)        | 160.40    | 124.71      |                     | 1783 Laki                                                                                |

5

10

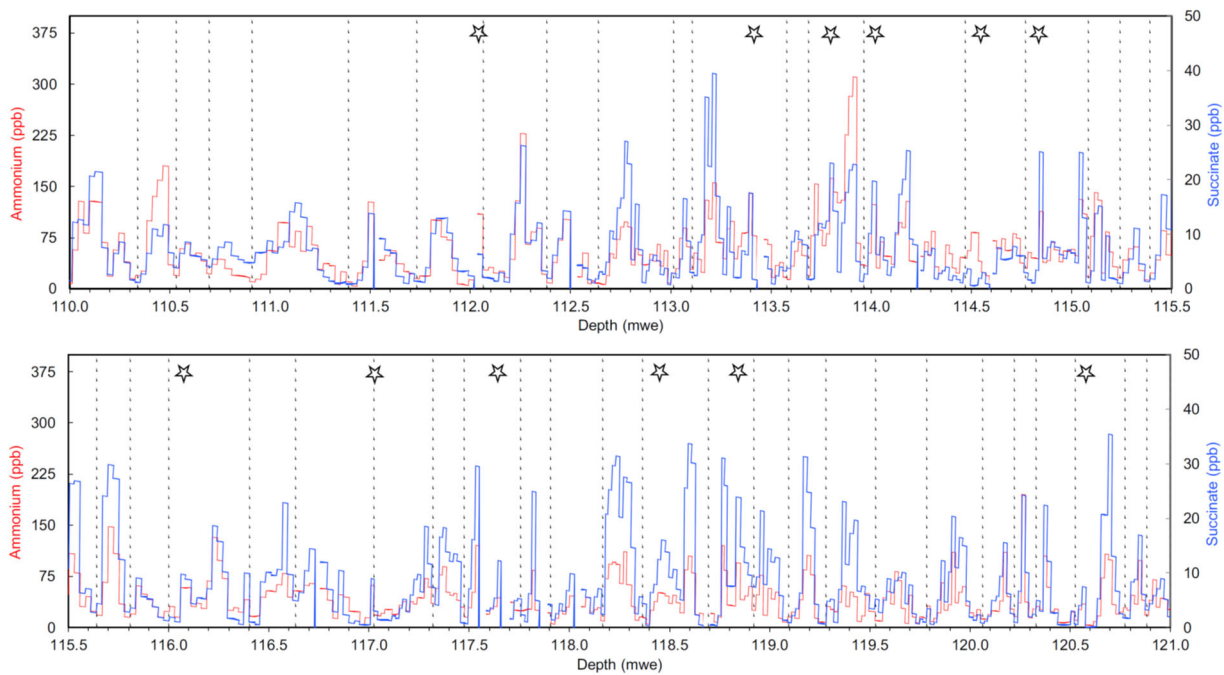

**Figure S1. Annual layer counting between 110 and 121 mwe from co-authors A5 and A3. Vertical dashed lines denote yearly dissection proposed by co-author A5 based on identification of winter layers characterized by low concentrations of ammonium and succinate. Stars indicate where co-author A3 counted additional years with respect to those counted by co-author A5.**

15

As discussed in section 2.2.1, the dating of the ELB ice core resulting from annual layer counting using ammonium and succinate profiles was achieved by 5 co-authors of the present paper. In the following we evaluate in the extent to which the different dating are consistent with volcanic horizons and from that estimate dating uncertainties. As seen in Figure S2, below the Katmai horizon layer located at 87.7 mwe depth, 5 layers (a to e) exhibit sulfate level exceeding 500 ppb together with acidity above  $5 \mu\text{Eq L}^{-1}$ . In addition, the layer (f) also revealed an acidity higher than  $5 \mu\text{Eq L}^{-1}$  whereas the sulfate level remained below 500 ppb. As seen in Table S1, we attributed layer (b) located at 112.57 mwe (dated at 1851) to the 1854 Shiveluch eruption (Kamchatka) of which the volcanic exclusivity index (VEI) was of 5 (Simkin & Siebert, 1994). Several candidates can explain the layer (a) located at 106.9 mwe (dated at 1874) including 1872 eruptions of Sinarka (Kurile Islands, VEI = 4) and Merapi (Java, VEI = 4), the 1873 eruption of Grimsvotn (Iceland, VEI = 4), the 1875 eruption of Askja (Iceland, VEI = 4), and the 1877 eruption of Cotopaxi (Ecuador, VEI = 4) as well as 1972 eruption of Vesuvius (Italy, VEI=3) located 2500 km to the west of Mt. Elbrus. For the layer (c) located at 115.03 mwe (dated at 1842) we only identify the 1835 Cosigüina eruption (Nicaragua, VEI = 5) as possible candidate. It is, however, difficult to reconcile the dates of layer b (1851) and c (1842) and identify 22 years between them. The series of spikes located between 118 and 120 mwe was previously identified as possibly related to the 1835 Cosigüina eruption are now attributed to the 1815 Tambora eruption. It remains unclear,

20

25

30 however, which layer (d dated at 1817 or f dated at 1813) corresponds to the 1815 Tambora eruption. Further studies including tephra analysis would here help to conclude. Finally, the layer (e) dated at 1789 may be related to the 1783 Laki eruption.

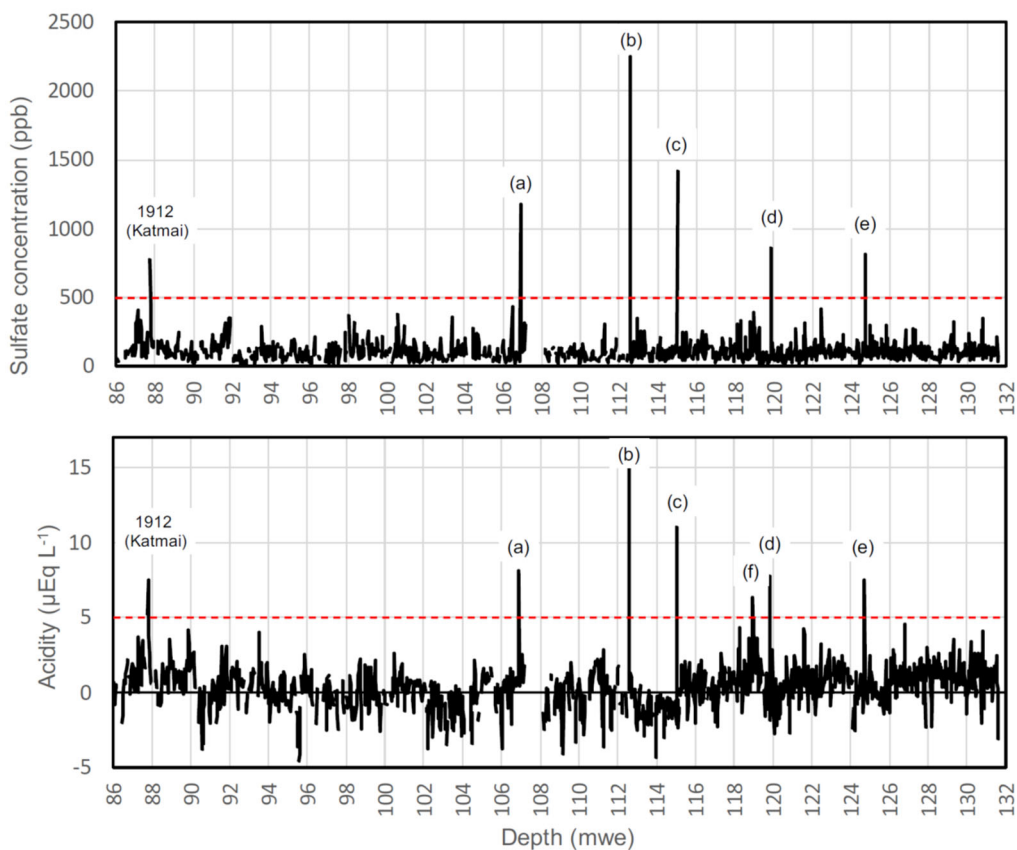

35

Figure S2. Raw profiles of sulfate and acidity in the Elbrus ice between 86 and 132 mwe. Samples considered to be impacted by large dust events has been removed (see Preunkert et al., 2019). In addition to the 1912 Katmai volcanic horizon at 87.75 mwe, several ice layers revealed sulfate concentrations exceeding 500 ppb (denoted (a) to (e)), and acidity higher than 5  $\mu\text{Eq L}^{-1}$  (denoted (a) to (f)) that would be related to other volcanic events (see Table 1). The horizontal red dashed lines indicate the sulfate concentration limit of 500 ppb, the acidity limit of 5  $\mu\text{Eq L}^{-1}$ .

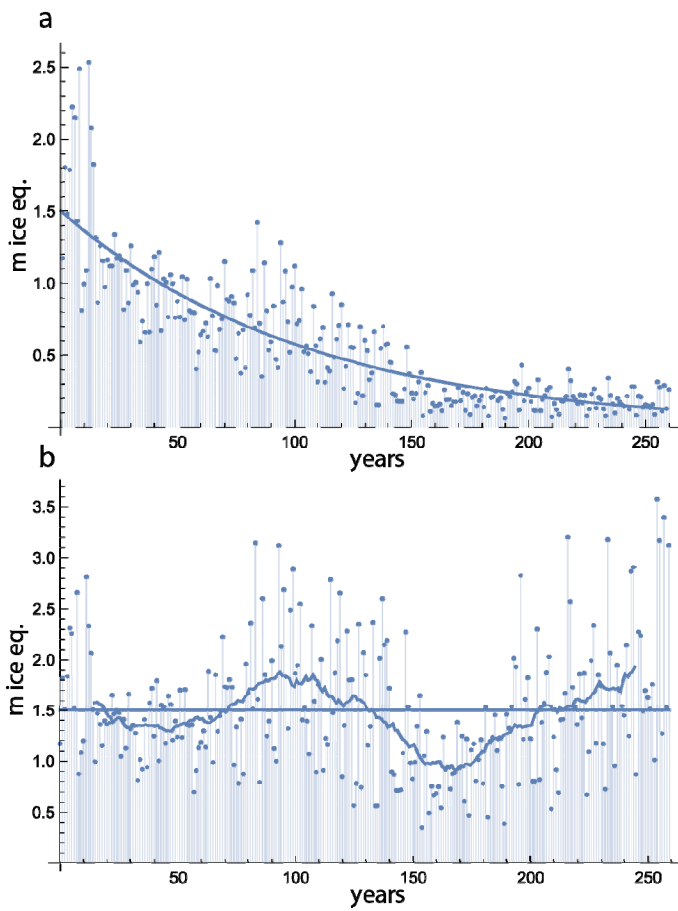

40 **Figure S3. Thickness of an annual layer as a function of age. Measured layer thickness in ice equivalent (a) and annual layer thickness corrected by the model of J. Nye (Nye, 1963; Dansgaard and Johnsen, 1969) (b)**

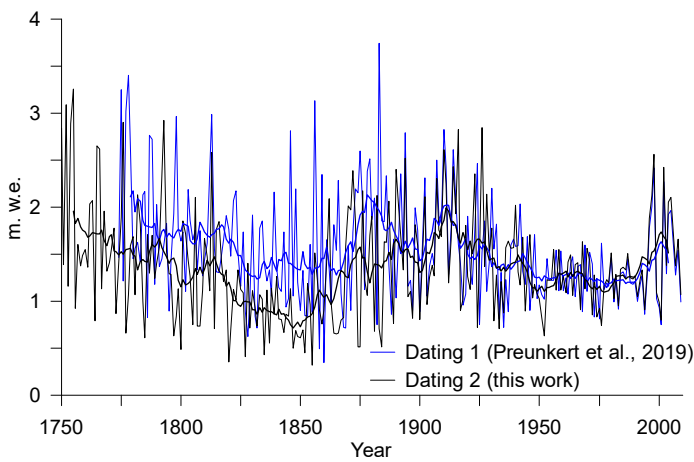

45 **Figure S4. Reconstruction of annual snow accumulation at the WP using the A5 (Preunkert et al., 2019) and A4 (this work, see section 2.2.1) chronologies. 10-year moving averages are shown in thick lines.**

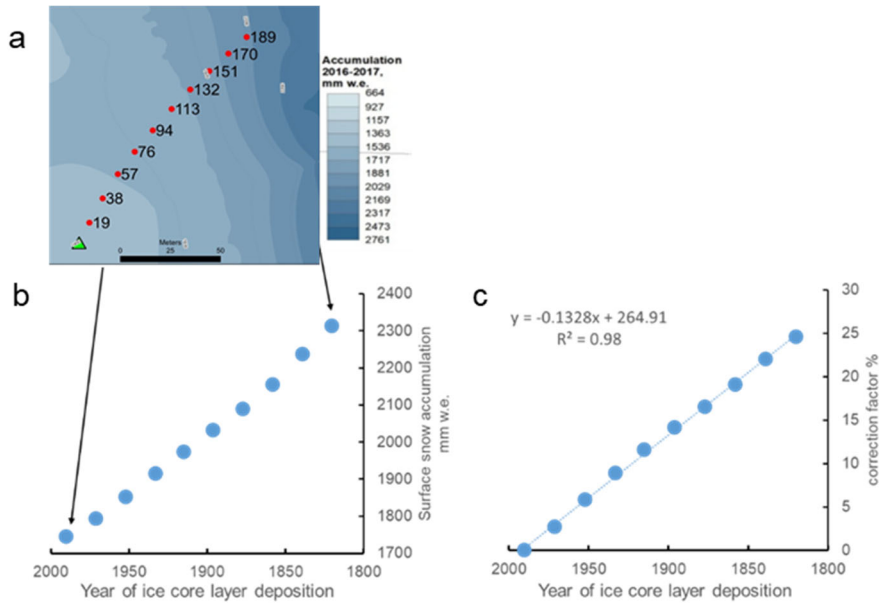

50 **Figure S5. Surface snow accumulation distribution in 2016-2017 (Lavrentiev et al., 2022) (a), surface snow accumulation corresponding to age when the ice core layer was deposited on the glacier surface (b); correction to account for the surface accumulation distribution (c).**

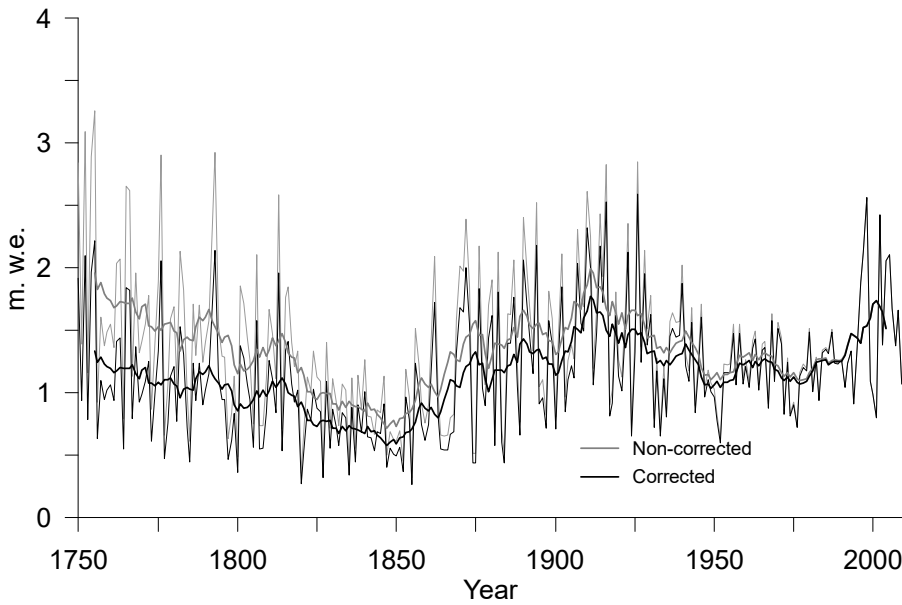

**Figure S6. Reconstruction of annual snow accumulation at the WP non-corrected and corrected for snow accumulation surface distribution (section 2.3.2)**

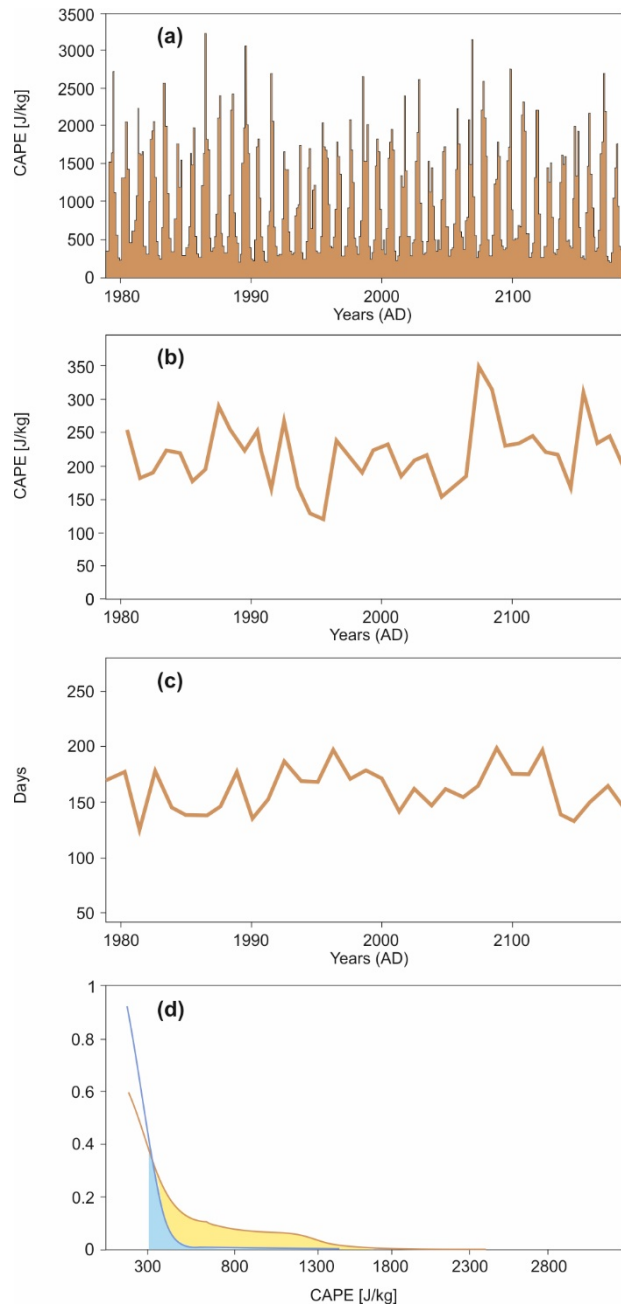

55

**Figure S7. Characteristics of CAPE in the Elbrus region for the period 1979 - 2017 according to CFSR reanalysis data: a) time course in 6-hour steps, b) average values for the warm half-year (May - September), c) number of days with CAPE >300 Jkg<sup>-1</sup> for each year, d) empirical distribution function of CAPE in winter (November - March) and summer (May - September), colored areas correspond to the total proportion of CAPE >300 Jkg<sup>-1</sup>, which in cold half-year is 7%, and in warm 40%**

60

65 Table S2. Seasonal calendar at WP calculated using CAPE

| Summer     |            | Winter     |            |
|------------|------------|------------|------------|
| from       | to         | from       | to         |
| 12.05.1979 | 16.10.1979 | 17.10.1979 | 09.04.1980 |
| 10.04.1980 | 03.10.1980 | 04.10.1980 | 08.05.1981 |
| 09.05.1981 | 25.10.1981 | 26.10.1981 | 21.04.1982 |
| 22.04.1982 | 16.10.1982 | 17.10.1982 | 17.05.1983 |
| 18.05.1983 | 23.09.1983 | 24.09.1983 | 07.04.1984 |
| 08.04.1984 | 02.10.1984 | 03.10.1984 | 27.04.1985 |
| 28.04.1985 | 20.09.1985 | 21.09.1985 | 29.04.1986 |
| 30.04.1986 | 16.09.1986 | 17.09.1986 | 13.05.1987 |
| 14.05.1987 | 30.09.1987 | 01.10.1987 | 18.05.1988 |
| 19.05.1988 | 12.10.1988 | 13.10.1988 | 10.04.1989 |
| 11.04.1989 | 06.10.1989 | 07.10.1989 | 10.05.1990 |
| 11.05.1990 | 25.09.1990 | 26.09.1990 | 15.04.1991 |
| 16.04.1991 | 20.09.1991 | 21.09.1991 | 19.04.1992 |
| 20.04.1992 | 25.10.1992 | 26.10.1992 | 13.04.1993 |
| 14.04.1993 | 01.10.1993 | 02.10.1993 | 08.04.1994 |
| 09.04.1994 | 25.09.1994 | 26.09.1994 | 13.04.1995 |
| 14.04.1995 | 30.10.1995 | 31.10.1995 | 02.05.1995 |
| 03.05.1996 | 22.10.1996 | 23.10.1996 | 22.04.1997 |
| 23.04.1997 | 18.10.1997 | 19.10.1997 | 26.04.1998 |
| 27.04.1998 | 16.10.1998 | 17.10.1998 | 16.05.1999 |
| 17.05.1999 | 07.10.1999 | 08.10.1999 | 13.04.2000 |
| 14.04.2000 | 26.09.2000 | 27.09.2000 | 10.05.2001 |
| 11.05.2001 | 06.10.2001 | 07.10.2001 | 06.05.2002 |
| 07.05.2002 | 16.10.2002 | 17.10.2002 | 26.05.2003 |
| 27.05.2003 | 29.10.2003 | 30.10.2003 | 27.04.2004 |
| 28.04.2004 | 10.10.2004 | 11.10.2004 | 14.04.2005 |
| 15.04.2005 | 31.10.2005 | 01.11.2005 | 06.05.2006 |
| 07.05.2006 | 30.10.2006 | 31.10.2006 | 07.05.2007 |
| 08.05.2007 | 30.10.2007 | 31.10.2007 | 31.03.2008 |
| 01.04.2008 | 16.10.2008 | 17.10.2008 | 28.04.2009 |
| 29.04.2009 | 27.09.2009 | 28.09.2009 | 16.05.2010 |
| 17.05.2010 | 29.10.2010 | 30.10.2010 | 18.05.2011 |
| 19.05.2011 | 19.10.2011 | 20.10.2011 | 25.04.2012 |
| 26.04.2012 | 09.10.2012 | 10.10.2012 | 01.05.2013 |
| 02.05.2013 | 25.09.2013 | 26.09.2013 | 18.04.2014 |
| 19.04.2014 | 18.10.2014 | 19.10.2014 | 27.04.2015 |



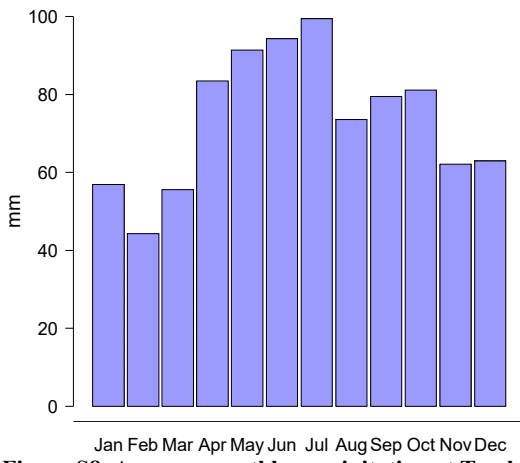

**Figure S8. Average monthly precipitation at Terskol weather station.**

70

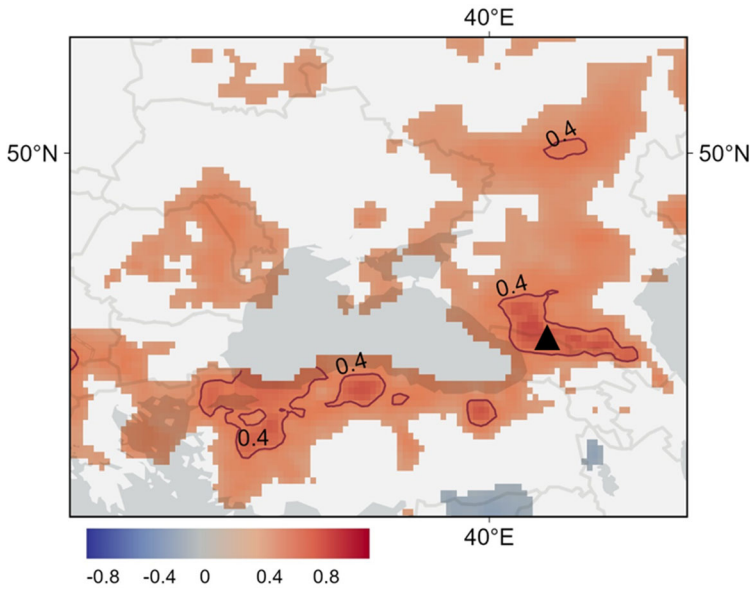

**Figure S9. Spatial correlation of the winter WP accumulation with March precipitation data of the GPCC data set in 1950-2009 period.**

75

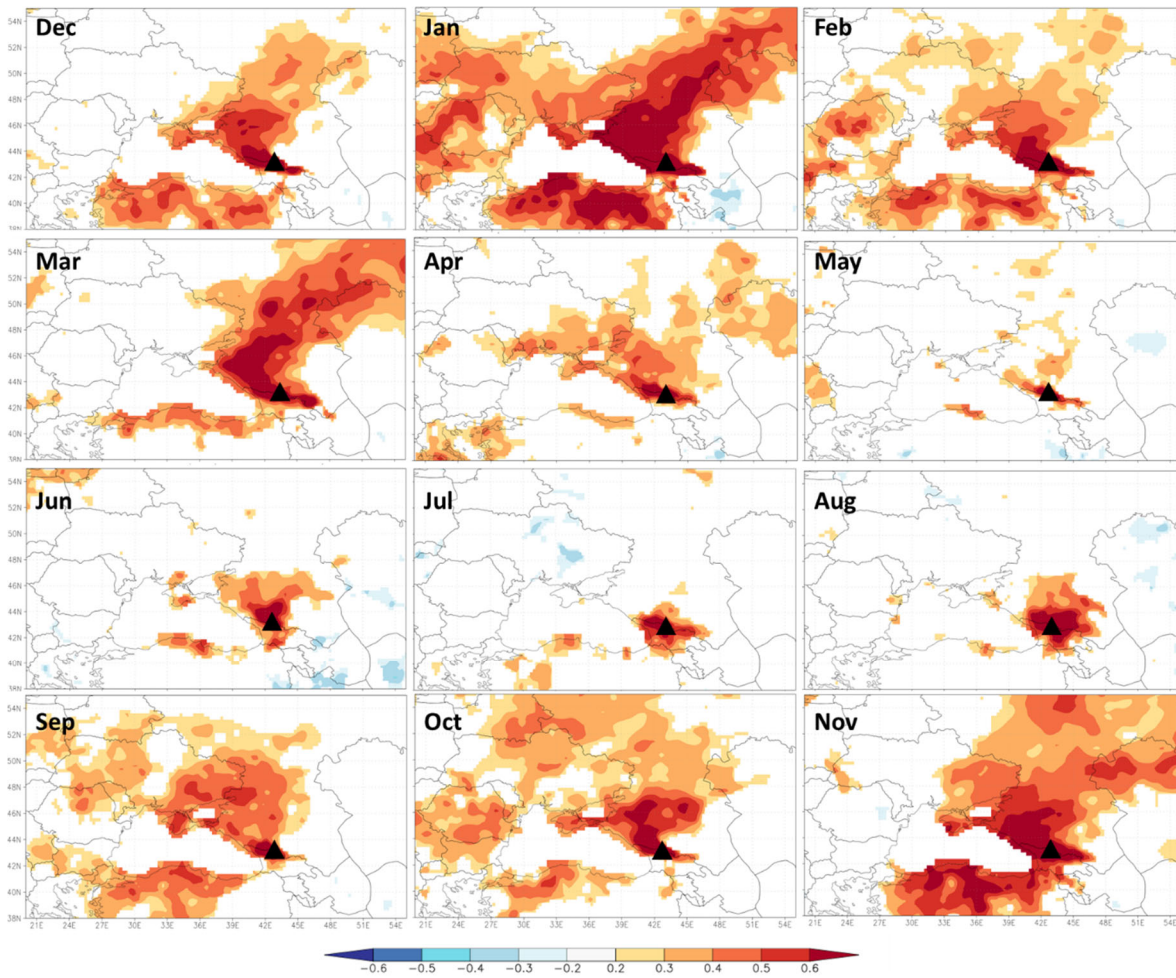

80 **Figure S10. Spatial correlation of Terskol weather station monthly precipitation data with the GPCP precipitation data for 1951-2009 period. Plotted using KNMI Climate Explorer (<https://climexp.knmi.nl/>).**

**Table S3. Elbrus WP Accumulation reconstruction**

| year | Annual (Oct-Sep) | summer (Apr-Sep) | winter (Oct-Mar) |
|------|------------------|------------------|------------------|
| 2009 | 1.07             | 0.62             | 0.45             |
| 2008 | 1.66             | 0.82             | 0.84             |
| 2007 | 1.37             | 0.80             | 0.57             |
| 2006 | 1.68             | 0.56             | 1.12             |
| 2005 | 2.11             | 0.80             | 1.31             |
| 2004 | 2.06             | 1.16             | 0.90             |
| 2003 | 1.38             | 0.83             | 0.56             |
| 2002 | 2.43             | 1.58             | 0.85             |
| 2001 | 0.80             | 0.67             | 0.13             |

|      |      |      |      |
|------|------|------|------|
| 2000 | 0.99 | 0.61 | 0.38 |
| 1999 | 1.09 | 0.70 | 0.40 |
| 1998 | 2.57 | 1.31 | 1.25 |
| 1997 | 2.13 | 1.44 | 0.68 |
| 1996 | 1.88 | 1.55 | 0.34 |
| 1995 | 1.37 | 1.08 | 0.29 |
| 1994 | 0.91 | 0.71 | 0.20 |
| 1993 | 1.33 | 0.66 | 0.68 |
| 1992 | 1.24 | 0.87 | 0.37 |
| 1991 | 1.05 | 0.82 | 0.23 |
| 1990 | 1.26 | 0.93 | 0.33 |
| 1989 | 1.23 | 1.05 | 0.18 |
| 1988 | 1.24 | 0.77 | 0.47 |
| 1987 | 1.49 | 0.96 | 0.53 |
| 1986 | 1.32 | 1.09 | 0.23 |
| 1985 | 1.35 | 1.02 | 0.33 |
| 1984 | 1.33 | 1.04 | 0.28 |
| 1983 | 0.94 | 0.86 | 0.08 |
| 1982 | 1.26 | 0.93 | 0.34 |
| 1981 | 1.01 | 0.71 | 0.29 |
| 1980 | 1.49 | 1.18 | 0.31 |
| 1979 | 1.18 | 0.83 | 0.34 |
| 1978 | 1.21 | 0.80 | 0.40 |
| 1977 | 1.13 | 0.83 | 0.31 |
| 1976 | 0.72 | 0.65 | 0.08 |
| 1975 | 0.90 | 0.84 | 0.06 |
| 1974 | 0.82 | 0.75 | 0.06 |
| 1973 | 1.25 | 0.73 | 0.52 |
| 1972 | 0.83 | 0.46 | 0.37 |
| 1971 | 1.39 | 0.44 | 0.96 |
| 1970 | 1.52 | 0.82 | 0.69 |
| 1969 | 1.09 | 0.58 | 0.51 |
| 1968 | 1.58 | 0.63 | 0.96 |
| 1967 | 0.88 | 0.54 | 0.34 |
| 1966 | 1.36 | 0.42 | 0.94 |
| 1965 | 1.34 | 0.60 | 0.74 |
| 1964 | 1.03 | 0.59 | 0.44 |
| 1963 | 1.44 | 0.28 | 1.16 |
| 1962 | 1.36 | 0.77 | 0.59 |
| 1961 | 1.05 | 0.82 | 0.22 |

|      |      |      |      |
|------|------|------|------|
| 1960 | 1.21 | 0.66 | 0.55 |
| 1959 | 1.07 | 0.77 | 0.30 |
| 1958 | 1.48 | 0.54 | 0.94 |
| 1957 | 1.06 | 0.48 | 0.58 |
| 1956 | 1.48 | 0.79 | 0.69 |
| 1955 | 1.17 | 0.91 | 0.26 |
| 1954 | 1.16 | 0.49 | 0.67 |
| 1953 | 1.17 | 0.68 | 0.49 |
| 1952 | 0.60 | 0.55 | 0.06 |
| 1951 | 0.78 | 0.28 | 0.51 |
| 1950 | 0.97 | 0.62 | 0.35 |
| 1949 | 1.01 | 0.74 | 0.28 |
| 1948 | 1.11 | 0.66 | 0.45 |
| 1947 | 0.97 | 0.45 | 0.52 |
| 1946 | 1.61 | 1.06 | 0.55 |
| 1945 | 1.21 | 0.46 | 0.76 |
| 1944 | 0.84 | 0.67 | 0.18 |
| 1943 | 1.57 | 0.77 | 0.81 |
| 1942 | 1.10 | 0.58 | 0.52 |
| 1941 | 1.22 | 0.70 | 0.52 |
| 1940 | 1.88 | 0.88 | 1.01 |
| 1939 | 1.47 | 0.80 | 0.66 |
| 1938 | 1.46 | 1.07 | 0.39 |
| 1937 | 1.52 | 0.72 | 0.80 |
| 1936 | 1.46 | 0.76 | 0.70 |
| 1935 | 0.81 | 0.58 | 0.23 |
| 1934 | 1.12 | 0.77 | 0.35 |
| 1933 | 0.66 | 0.36 | 0.30 |
| 1932 | 1.18 | 1.12 | 0.06 |
| 1931 | 0.73 | 0.67 | 0.06 |
| 1930 | 1.63 | 1.35 | 0.28 |
| 1929 | 1.39 | 1.27 | 0.13 |
| 1928 | 1.96 | 1.65 | 0.31 |
| 1927 | 1.25 | 0.93 | 0.32 |
| 1926 | 2.61 | 1.82 | 0.79 |
| 1925 | 1.33 | 0.69 | 0.65 |
| 1924 | 0.66 | 0.39 | 0.26 |
| 1923 | 2.14 | 1.57 | 0.58 |
| 1922 | 1.53 | 1.14 | 0.39 |
| 1921 | 1.02 | 0.76 | 0.26 |

|      |      |      |      |
|------|------|------|------|
| 1920 | 1.14 | 0.53 | 0.61 |
| 1919 | 1.63 | 1.30 | 0.34 |
| 1918 | 0.92 | 0.78 | 0.14 |
| 1917 | 0.82 | 0.75 | 0.07 |
| 1916 | 2.55 | 2.15 | 0.40 |
| 1915 | 1.74 | 1.43 | 0.30 |
| 1914 | 2.19 | 1.75 | 0.43 |
| 1913 | 1.49 | 0.65 | 0.84 |
| 1912 | 1.07 | 0.79 | 0.28 |
| 1911 | 2.02 | 1.20 | 0.81 |
| 1910 | 2.34 | 1.33 | 1.01 |
| 1909 | 1.51 | 1.29 | 0.22 |
| 1908 | 1.57 | 1.35 | 0.22 |
| 1907 | 2.05 | 1.48 | 0.58 |
| 1906 | 1.13 | 0.33 | 0.80 |
| 1905 | 1.23 | 0.75 | 0.47 |
| 1904 | 1.12 | 0.86 | 0.26 |
| 1903 | 0.86 | 0.65 | 0.21 |
| 1902 | 1.87 | 1.19 | 0.67 |
| 1901 | 1.27 | 1.20 | 0.07 |
| 1900 | 0.71 | 0.57 | 0.14 |
| 1899 | 1.40 | 0.79 | 0.60 |
| 1898 | 1.59 | 1.46 | 0.13 |
| 1897 | 0.72 | 0.39 | 0.33 |
| 1896 | 0.97 | 0.83 | 0.14 |
| 1895 | 0.92 | 0.87 | 0.05 |
| 1894 | 2.20 | 2.01 | 0.19 |
| 1893 | 1.16 | 1.02 | 0.15 |
| 1892 | 1.48 | 1.40 | 0.07 |
| 1891 | 1.72 | 1.37 | 0.35 |
| 1890 | 2.09 | 2.00 | 0.08 |
| 1889 | 0.66 | 0.41 | 0.25 |
| 1888 | 1.06 | 0.68 | 0.38 |
| 1887 | 1.78 | 1.15 | 0.63 |
| 1886 | 1.41 | 0.45 | 0.95 |
| 1885 | 1.41 | 0.30 | 1.10 |
| 1884 | 0.44 | 0.37 | 0.07 |
| 1883 | 0.61 | 0.53 | 0.08 |
| 1882 | 1.82 | 0.85 | 0.97 |
| 1881 | 0.57 | 0.19 | 0.38 |

|      |      |      |      |
|------|------|------|------|
| 1880 | 1.60 | 1.44 | 0.16 |
| 1879 | 1.43 | 0.73 | 0.70 |
| 1878 | 0.89 | 0.81 | 0.08 |
| 1877 | 1.03 | 0.33 | 0.70 |
| 1876 | 1.82 | 0.35 | 1.46 |
| 1875 | 0.43 | 0.35 | 0.08 |
| 1874 | 0.43 | 0.32 | 0.11 |
| 1873 | 1.54 | 0.92 | 0.62 |
| 1872 | 1.98 | 1.87 | 0.11 |
| 1871 | 1.64 | 1.32 | 0.32 |
| 1870 | 1.67 | 0.98 | 0.68 |
| 1869 | 1.31 | 1.04 | 0.27 |
| 1868 | 0.68 | 0.42 | 0.26 |
| 1867 | 0.66 | 0.57 | 0.09 |
| 1866 | 0.54 | 0.27 | 0.27 |
| 1865 | 0.54 | 0.45 | 0.09 |
| 1864 | 0.54 | 0.45 | 0.09 |
| 1863 | 0.81 | 0.53 | 0.28 |
| 1862 | 1.71 | 1.24 | 0.47 |
| 1861 | 1.15 | 0.69 | 0.45 |
| 1860 | 0.74 | 0.46 | 0.27 |
| 1859 | 0.62 | 0.15 | 0.46 |
| 1858 | 0.74 | 0.56 | 0.18 |
| 1857 | 1.00 | 0.62 | 0.38 |
| 1856 | 1.23 | 1.02 | 0.21 |
| 1855 | 0.26 | 0.20 | 0.06 |
| 1854 | 0.78 | 0.72 | 0.06 |
| 1853 | 0.96 | 0.82 | 0.14 |
| 1852 | 0.36 | 0.29 | 0.07 |
| 1851 | 0.56 | 0.49 | 0.07 |
| 1850 | 0.49 | 0.35 | 0.14 |
| 1849 | 0.50 | 0.44 | 0.07 |
| 1848 | 0.55 | 0.48 | 0.07 |
| 1847 | 0.40 | 0.20 | 0.20 |
| 1846 | 0.90 | 0.69 | 0.21 |
| 1845 | 0.67 | 0.60 | 0.07 |
| 1844 | 0.69 | 0.61 | 0.07 |
| 1843 | 0.53 | 0.46 | 0.07 |
| 1842 | 0.64 | 0.54 | 0.10 |
| 1841 | 0.64 | 0.43 | 0.21 |

|      |      |      |      |
|------|------|------|------|
| 1840 | 1.00 | 0.78 | 0.22 |
| 1839 | 0.68 | 0.45 | 0.23 |
| 1838 | 0.90 | 0.45 | 0.45 |
| 1837 | 0.44 | 0.33 | 0.11 |
| 1836 | 0.88 | 0.54 | 0.33 |
| 1835 | 0.34 | 0.11 | 0.22 |
| 1834 | 0.80 | 0.68 | 0.11 |
| 1833 | 0.84 | 0.73 | 0.11 |
| 1832 | 0.58 | 0.46 | 0.12 |
| 1831 | 0.73 | 0.58 | 0.15 |
| 1830 | 0.86 | 0.78 | 0.08 |
| 1829 | 0.55 | 0.48 | 0.08 |
| 1828 | 1.09 | 0.80 | 0.28 |
| 1827 | 0.32 | 0.16 | 0.16 |
| 1826 | 0.84 | 0.16 | 0.68 |
| 1825 | 0.87 | 0.79 | 0.08 |
| 1824 | 1.03 | 0.69 | 0.34 |
| 1823 | 0.78 | 0.69 | 0.09 |
| 1822 | 0.86 | 0.26 | 0.60 |
| 1821 | 0.53 | 0.44 | 0.09 |
| 1820 | 0.27 | 0.18 | 0.09 |
| 1819 | 1.02 | 0.54 | 0.48 |
| 1818 | 0.92 | 0.37 | 0.56 |
| 1817 | 1.07 | 0.74 | 0.33 |
| 1816 | 1.40 | 0.71 | 0.69 |
| 1815 | 1.34 | 0.70 | 0.64 |
| 1814 | 0.54 | 0.35 | 0.18 |
| 1813 | 1.95 | 0.81 | 1.14 |
| 1812 | 0.84 | 0.56 | 0.28 |
| 1811 | 1.11 | 0.92 | 0.19 |
| 1810 | 1.26 | 0.61 | 0.65 |
| 1809 | 0.84 | 0.47 | 0.37 |
| 1808 | 0.55 | 0.46 | 0.09 |
| 1807 | 0.55 | 0.46 | 0.09 |
| 1806 | 1.57 | 1.48 | 0.09 |
| 1805 | 0.56 | 0.46 | 0.09 |
| 1804 | 0.94 | 0.38 | 0.56 |
| 1803 | 1.07 | 0.92 | 0.15 |
| 1802 | 1.27 | 1.12 | 0.15 |
| 1801 | 1.37 | 0.76 | 0.61 |

|      |      |      |      |
|------|------|------|------|
| 1800 | 0.36 | 0.21 | 0.15 |
| 1799 | 0.83 | 0.68 | 0.15 |
| 1798 | 0.62 | 0.46 | 0.16 |
| 1797 | 0.47 | 0.31 | 0.15 |
| 1796 | 0.94 | 0.78 | 0.16 |
| 1795 | 0.94 | 0.79 | 0.15 |
| 1794 | 1.12 | 0.96 | 0.16 |
| 1793 | 2.14 | 1.82 | 0.32 |
| 1792 | 1.71 | 0.97 | 0.75 |
| 1791 | 1.15 | 1.04 | 0.11 |
| 1790 | 1.02 | 0.86 | 0.16 |
| 1789 | 0.90 | 0.80 | 0.10 |
| 1788 | 1.23 | 1.12 | 0.11 |
| 1787 | 0.94 | 0.84 | 0.10 |
| 1786 | 1.23 | 1.12 | 0.11 |
| 1785 | 0.44 | 0.33 | 0.11 |
| 1784 | 0.72 | 0.61 | 0.11 |
| 1783 | 1.31 | 0.87 | 0.44 |
| 1782 | 1.53 | 1.42 | 0.11 |
| 1781 | 0.77 | 0.55 | 0.22 |
| 1780 | 1.21 | 1.10 | 0.11 |
| 1779 | 1.13 | 1.02 | 0.12 |
| 1778 | 0.76 | 0.58 | 0.18 |
| 1777 | 0.47 | 0.35 | 0.12 |
| 1776 | 2.06 | 1.94 | 0.12 |
| 1775 | 1.34 | 1.22 | 0.12 |
| 1774 | 0.99 | 0.88 | 0.11 |
| 1773 | 0.61 | 0.50 | 0.11 |
| 1772 | 1.25 | 1.14 | 0.12 |
| 1771 | 1.09 | 0.97 | 0.12 |
| 1770 | 0.99 | 0.75 | 0.24 |
| 1769 | 0.93 | 0.67 | 0.25 |
| 1768 | 1.37 | 0.30 | 1.07 |
| 1767 | 0.79 | 0.66 | 0.13 |
| 1766 | 1.82 | 1.69 | 0.14 |
| 1765 | 1.84 | 1.71 | 0.14 |
| 1764 | 0.55 | 0.41 | 0.14 |
| 1763 | 1.43 | 1.30 | 0.13 |
| 1762 | 1.41 | 1.14 | 0.27 |
| 1761 | 0.94 | 0.53 | 0.41 |



|      |      |      |      |
|------|------|------|------|
| 1760 | 1.07 | 0.94 | 0.13 |
| 1759 | 1.02 | 0.89 | 0.13 |
| 1758 | 0.95 | 0.82 | 0.13 |
| 1757 | 1.10 | 0.98 | 0.12 |
| 1756 | 0.63 | 0.50 | 0.13 |
| 1755 | 2.22 | 1.96 | 0.26 |
| 1754 | 1.97 | 1.83 | 0.13 |
| 1753 | 0.79 | 0.65 | 0.13 |
| 1752 | 2.10 | 1.97 | 0.13 |
| 1751 | 0.94 | 0.67 | 0.27 |
| 1750 | 1.92 | 1.66 | 0.27 |
